# Supplementary material for: Development of a Parsimonious Design for Optimal Classification of Exclusive Breastfeeding
Source: PubMed Central journal article supplement (PMC6709417; doi:10.1002/psp4.12428), 2019-07-03
Supplement: PSP4-8-596-s001.pdf [file PSP4-8-596-s001.pdf]

## Supplement 1.

Of note, the content in this supplement serves as a brief summary and the corresponding details were presented in our previous publication [9].

### Structure model

The structure model used in this study is a two linked 1-compartment disposition models that represent mother and infant as in Figure S1.

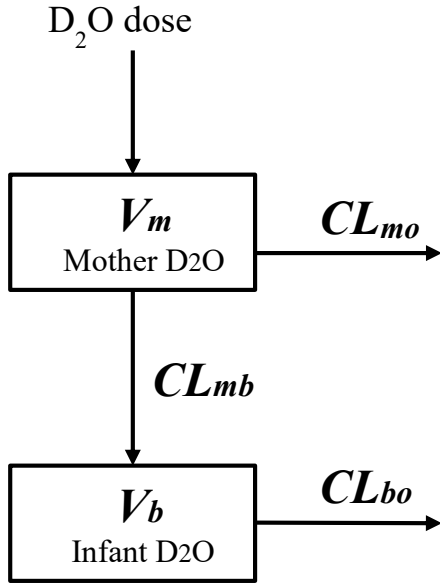

Figure S1. D<sub>2</sub>O disposition model for mother and infant. The term  $V$  denotes the D<sub>2</sub>O volume of distribution with subscript  $m$  and  $b$  for mother and baby (also termed infant);  $CL_{mb}$  is the water clearance from mother to infant;  $CL_{bo}$  is the water clearance from infant to out; the term  $CL_{mo}$  represents the water clearance from mother to out.

The system expressed as rate constants (for simplicity) is given:

$$dA_m/dt = -(k_{mm} - k_{mb})A_m - k_{mb}A_m = -k_{mm}A_m \quad (\text{at } t = 0, A_m = \text{dose}) \quad (1)$$

$$dA_b/dt = k_{mb}A_m - k_{bo}A_b \quad (\text{at } t = 0, A_b = 0) \quad (2)$$

The analytical solutions of equation (1) and (2) are:

$$A_m(t) = A_m(0)e^{-k_{mm}t} \quad (3)$$

$$A_b(t) = A_m(0) \left( \frac{k_{mb}}{k_{mm} - k_{bo}} \right) (e^{-k_{bo}t} - e^{-k_{mm}t}) \quad (4)$$

Where,

$$k_{bo} = k_{bo(H_2O)} = \frac{CL_{bo}}{V_b} \quad (5)$$

$$k_{mb} = k_{mb(H_2O)} = \frac{CL_{mb}}{V_m} \quad (6)$$

In this notation,  $A_{m(t)}$  is the mass of D<sub>2</sub>O in mother compartment at time t, (units: kg);  $A_{m(0)}$  is equal to dose, (units: kg);  $A_{b(t)}$  is the mass of D<sub>2</sub>O in infant compartment at time t, (units: kg);  $k_{mm}$  is the rate constant, describing D<sub>2</sub>O total elimination from the mother compartment, (units: 1/day);  $k_{mb}$  is the rate constant describing D<sub>2</sub>O flow from the mother to the infant via lactation route, (units: 1/day);  $k_{mb(H_2O)}$  is the rate constant describing H<sub>2</sub>O flow from the mother to the infant via lactation route, (units: 1/day);  $k_{bo}$  is the rate constant describing D<sub>2</sub>O flow out of the infant compartment, (units: 1/day);  $k_{bo(H_2O)}$  is the rate constant describing H<sub>2</sub>O flow out of the infant compartment, (units: 1/day).  $CL_{bo}$  is the H<sub>2</sub>O clearance rate from infant, (units: L/day);  $CL_{mb}$  is the H<sub>2</sub>O clearance rate from mother to infant, (units: L/day);  $V_b$  is the D<sub>2</sub>O volume of distribution in infant compartment, (units: L); and  $V_m$  is the D<sub>2</sub>O volume of distribution in mother compartment, (units: L).

The final model consists of four parameters  $k_{mm}$ ,  $V_m$ ,  $CL_{mb}$  and  $CL_{bo}$ . Of these, the parameters  $CL_{mb}$  and  $CL_{bo}$  are of primary importance to determine the non-breastmilk water intake.

### ***Statistical models***

A standard three-stage hierarchical model was used. Stage 1) the model for the data; Stage 2) the model for heterogeneity between individuals; Stage 3) the model for the priors. An additional part is also presented here about the statistical models to calculate  $R_s$ .

#### *Stage 1: model for the data*

$$y_{ij} \sim N(f(\boldsymbol{\theta}_i, x_{ij}), \sigma^2) \quad (7)$$

where  $y_{ij}$  denotes the  $j^{th}$  observation for the  $i^{th}$  subject,  $f(\boldsymbol{\theta}_i, x_{ij})$  is the expected value of the data from the model prediction,  $\boldsymbol{\theta}_i$  is a vector (dimension  $p \times 1$ , where  $p$  is the number of parameters) of individual parameter values for the  $i^{th}$  individual,  $x_{ij}$  is a sampling time (and other design variables such as dose),  $N$  represents a normal distribution with (in this case) zero mean and standard deviation  $\sigma$ .

#### *Stage 2: model for heterogeneity between individuals*

The distribution of an individuals' PK parameter vectors  $\boldsymbol{\theta}_i$  are shown,

$$\ln(\boldsymbol{\theta}_i) \sim N_p(\ln(\boldsymbol{\mu}), \boldsymbol{\Omega}), \text{ and} \quad (8)$$

$$\boldsymbol{\Omega} \sim Q_p(\boldsymbol{\rho}, \mathbf{V}) \quad (9)$$

where  $\boldsymbol{\mu}$  is a vector of mean population pharmacokinetic parameters and  $\boldsymbol{\Omega}$  is the variance–covariance matrix of between subject random variability.  $N_p$  represents a  $p$  – dimensional multivariate normal distribution.  $Q_p$  is the quadratic form using the column vector  $\mathbf{V}$  as a diagonal matrix,  $\boldsymbol{\rho}$  is the LKJ correlation matrix, generating random correlation matrices based on vines and extended onion method [11].  $Q_p$  is equivalent with the calculation result of  $\mathbf{V}\boldsymbol{\rho}\mathbf{V}$

(where  $\mathbf{V}$  is diagonal), which provides the variance-covariance matrix for the fitted parameters. A detailed description about  $\boldsymbol{\rho}$  and  $\mathbf{V}$  can be found in [12].

### Stage 3: Model for the priors

Priors for the analysis include: 1) priors for the parameters and, 2) priors for the known variables.

The prior of the residual variance is:

$$\sigma \sim N(0, 1000) \text{ with } \sigma > 0 \quad (10)$$

Here  $\sigma$  is sampled from a truncated normal distribution.

The prior for the vector of mean parameters, in this study,  $\boldsymbol{\mu}$ , i.e.  $CL_{mb}$ ,  $CL_{bo}$ ,  $k_{mm}$ , and  $V_m$ , is given by a low information prior was assumed for all:

$$\ln(\boldsymbol{\mu}) \sim N(0, 1000) \quad (11)$$

The priors of the variance-covariance matrix  $\boldsymbol{\Omega} \sim Q_p(\boldsymbol{\rho}, \mathbf{V})$  is:

$$\boldsymbol{\rho} \sim \text{lkj\_corr}(1) \quad (12)$$

$$\boldsymbol{\lambda}_i \sim N(0, 1000) \text{ with } \boldsymbol{\lambda}_i > 0, \text{ and } \mathbf{V} = \boldsymbol{\lambda} \mathbf{I}_p \quad (13)$$

Here  $\mathbf{I}_p$  represents a  $p \times p$  identity matrix, the parameter “1” in the lkj\_corr function is the shape parameter. In this case “1” represents a bounded uniform distribution on the space of correlations, and  $\mathbf{V}$  is from a truncated normal distribution.

### Calculation of $R_s$

$$R_s = R_{c(bo)} + R_g - CL_{mb} - R_m - R_a \quad (14)$$

The models used to calculate  $R_{c(bo)}$ ,  $R_g$ ,  $R_m$  and  $R_a$  are presented as below. NB, the value of  $CL_{mb}$  is part of the structural model for which the posterior distribution is estimated.

-  $R_{c(bo)}$ : Total infant’s water output rate after isotopic fractionation correction

$$R_{c(bo)}(L/day) = CL_{bo}/0.9906 \quad (15)$$

NB, the value of  $CL_{bo}$  is part of the structural model for which the posterior distribution is estimated.

-  $R_g$ : Water retaining rate for infant's growth

$$R_g(L/day) = (TBW_{ls} - TBW_{fs}) / (day_{ls} - day_{fs}) \quad (16)$$

$TBW_{ls}$  and  $TBW_{fs}$  represent the infant's total body water at the last sampling day (i.e. subscript  $ls$ ) and at the first sampling day (i.e. subscript  $fs$ ), respectively and  $day_{ls} - day_{fs}$  describes the experimental sampling period, usually 14 days in this study.

$TBW$  is calculated with equation (17), according to the infant's weight,  $WT$ .

$$\ln TBW (L) = a + (b \times \ln WT) \quad (17)$$

Where,

$$a \sim N(-0.427, 0.012)$$

$$b \sim N(0.963, 0.005)$$

-  $CL_{mb}$  – a structural parameter in the pharmacokinetic model.

-  $R_m$ : Intake rate of water metabolised from protein, fat, and carbohydrate in breastmilk

$$M(kg/day) = CL_{mb} / [0.889 (SE, 0.0013)] \quad (18)$$

$M(kg/day)$ : the total mass of breastmilk intake per day

$$R_m(L/day) = [0.07733 (SE, 0.00117)] \times M \quad (19)$$

-  $R_a$ : Absorption of atmospheric water by lungs and skin

$$R_a(L/day) = [0.063 (SE, 0.017)] \times (R_{c(bo)} + R_g) \quad (20)$$
