# Supplementary material for: Development of a Parsimonious Design for Optimal Classification of Exclusive Breastfeeding
Source: PubMed Central journal article supplement (PMC6709417; doi:10.1002/psp4.12428), 2019-07-03
Supplement: PSP4-8-596-s003.pdf [file PSP4-8-596-s003.pdf]

### Supplement 3.

Table S1. Low information prior

|                | typical values |      | BSV  |      |
|----------------|----------------|------|------|------|
|                | mean           | SD   | mean | SD   |
| $\ln(V_m)$     | 0              | 1000 | 0    | 1000 |
| $\ln(k_{mm})$  | 0              | 1000 | 0    | 1000 |
| $\ln(CL_{mb})$ | 0              | 1000 | 0    | 1000 |
| $\ln(CL_{bo})$ | 0              | 1000 | 0    | 1000 |

\*typical values and BSV (Between Subject Variability;  $BSV > 0$ ) are assumed as normal distribution, which is denoted here as mean and standard deviation (SD).

Table S2. Informative prior

|                | typical values |      | BSV  |      |
|----------------|----------------|------|------|------|
|                | mean           | SD   | mean | SD   |
| $\ln(V_m)$     | 3.45           | 0.01 | 0.15 | 0.01 |
| $\ln(k_{mm})$  | -2.17          | 0.01 | 0.18 | 0.01 |
| $\ln(CL_{mb})$ | -0.36          | 0.02 | 0.31 | 0.01 |
| $\ln(CL_{bo})$ | -0.05          | 0.02 | 0.23 | 0.01 |

\*typical values and BSV (Between Subject Variability;  $BSV > 0$ ) are assumed as normal distribution, which is denoted here as mean and standard deviation (SD). For all the parameters, the mean and SD values were set to the posterior of the base model analysis.
