# Supplementary material for: Development of a Parsimonious Design for Optimal Classification of Exclusive Breastfeeding
Source: PubMed Central journal article supplement (PMC6709417; doi:10.1002/psp4.12428), 2019-07-03
Supplement: PSP4-8-596-s008.pdf [file PSP4-8-596-s008.pdf]

## Supplement 8.

Table S4. *Streamline designs A* (the mixed prior) with successful convergence.

| No | Design | Sensitivity | Specificity | No | Design | Sensitivity | Specificity |
|----|--------|-------------|-------------|----|--------|-------------|-------------|
| 1  | 3+8    | 0.83        | 0.93        | 19 | 2+5+7  | 0.93        | 0.94        |
| 2  | 3+9    | 0.84        | 0.93        | 20 | 2+5+8  | 0.95        | 0.95        |
| 3  | 4+7    | 0.82        | 0.93        | 21 | 2+5+9  | 0.97        | 0.95        |
| 4  | 5+7    | 0.98        | 0.94        | 22 | 3+5+7  | 0.97        | 0.97        |
| 5  | 5+8    | 0.99        | 0.94        | 23 | 3+5+8  | 0.99        | 0.97        |
| 6  | 5+9    | 0.98        | 0.95        | 24 | 3+5+9  | 0.99        | 0.97        |
| 7  | 3+13   | 0.84        | 0.94        | 25 | 2+7+13 | 0.98        | 0.94        |
| 8  | 5+14   | 0.94        | 0.96        | 26 | 2+7+14 | 1.00        | 0.94        |
| 9  | 6+14   | 0.95        | 0.97        | 27 | 2+8+13 | 0.97        | 0.93        |
| 10 | 7+13   | 0.98        | 0.96        | 28 | 2+8+14 | 0.99        | 0.93        |
| 11 | 7+14   | 0.98        | 0.97        | 29 | 2+9+13 | 0.97        | 0.92        |
| 12 | 8+13   | 0.99        | 0.96        | 30 | 2+9+14 | 0.99        | 0.92        |
| 13 | 8+14   | 0.99        | 0.96        | 31 | 3+7+13 | 0.99        | 0.94        |
| 14 | 9+13   | 0.99        | 0.95        | 32 | 3+7+14 | 1.00        | 0.93        |
| 15 | 9+14   | 0.99        | 0.96        | 33 | 3+8+13 | 0.99        | 0.94        |
| 16 | 1+5+7  | 0.89        | 0.93        | 34 | 3+8+14 | 1.00        | 0.93        |
| 17 | 1+5+8  | 0.91        | 0.94        | 35 | 3+9+13 | 0.99        | 0.95        |
| 18 | 1+5+9  | 0.96        | 0.95        | 36 | 3+9+14 | 0.99        | 0.93        |

Table S5. *Streamline designs B* (3-sample and the mixed prior) with successful convergence.

| No | Design | Sensitivity | Specificity | No | Design | Sensitivity | Specificity |
|----|--------|-------------|-------------|----|--------|-------------|-------------|
| 1  | 1+2+4  | 0.19        | 1.00        | 14 | 2+3+4  | 0.02        | 0.99        |
| 2  | 1+2+5  | 0.67        | 0.99        | 15 | 2+3+5  | 0.67        | 0.98        |
| 3  | 1+2+6  | 0.81        | 0.98        | 16 | 2+3+6  | 0.82        | 0.98        |
| 4  | 1+2+7  | 0.88        | 0.97        | 17 | 2+3+7  | 0.89        | 0.97        |
| 5  | 1+3+4  | 0.00        | 1.00        | 18 | 2+4+5  | 0.57        | 0.98        |
| 6  | 1+3+5  | 0.50        | 0.99        | 19 | 2+4+6  | 0.76        | 0.97        |
| 7  | 1+3+6  | 0.76        | 0.98        | 20 | 2+4+7  | 0.84        | 0.97        |
| 8  | 1+3+7  | 0.86        | 0.98        | 21 | 2+5+6  | 0.87        | 0.92        |
| 9  | 1+4+5  | 0.48        | 0.98        | 22 | 2+6+7  | 0.93        | 0.92        |
| 10 | 1+4+6  | 0.70        | 0.97        | 23 | 3+4+5  | 0.55        | 0.99        |
| 11 | 1+4+7  | 0.81        | 0.97        | 24 | 3+4+6  | 0.78        | 0.98        |
| 12 | 1+5+6  | 0.82        | 0.88        | 25 | 3+5+6  | 0.94        | 0.96        |
| 13 | 1+6+7  | 0.87        | 0.88        | 26 | 3+6+7  | 0.97        | 0.95        |

Table S6. *Streamline designs B* (4-sample, 5-sample, 6-sample and 7-sample and the mixed prior) with successful convergence.

| No | Design  | Sensitivity | Specificity | No | Design        | Sensitivity | Specificity |
|----|---------|-------------|-------------|----|---------------|-------------|-------------|
| 1  | 1+2+3+4 | 0.14        | 1.00        | 23 | 3+4+5+7       | 0.93        | 0.97        |
| 2  | 1+2+3+5 | 0.68        | 0.99        | 24 | 3+4+6+7       | 0.93        | 0.98        |
| 3  | 1+2+3+6 | 0.82        | 0.98        | 25 | 3+5+6+7       | 0.97        | 0.95        |
| 4  | 1+2+3+7 | 0.90        | 0.97        | 26 | 1+2+3+4+5     | 0.65        | 0.98        |
| 5  | 1+3+4+5 | 0.55        | 0.98        | 27 | 1+2+3+4+6     | 0.78        | 0.98        |
| 6  | 1+3+4+6 | 0.75        | 0.97        | 28 | 1+2+3+4+7     | 0.87        | 0.98        |
| 7  | 1+3+4+7 | 0.86        | 0.97        | 29 | 1+3+4+5+6     | 0.84        | 0.97        |
| 8  | 1+3+5+6 | 0.87        | 0.98        | 30 | 1+3+4+5+7     | 0.90        | 0.98        |
| 9  | 1+3+5+7 | 0.93        | 0.97        | 31 | 1+3+4+6+7     | 0.92        | 0.98        |
| 10 | 1+4+5+6 | 0.80        | 0.96        | 32 | 1+3+5+6+7     | 0.94        | 0.97        |
| 11 | 1+4+5+7 | 0.89        | 0.96        | 33 | 1+4+5+6+7     | 0.92        | 0.95        |
| 12 | 1+5+6+7 | 0.87        | 0.89        | 34 | 2+3+4+5+6     | 0.84        | 0.97        |
| 13 | 2+3+4+5 | 0.60        | 0.97        | 35 | 2+3+4+5+7     | 0.91        | 0.97        |
| 14 | 2+3+4+6 | 0.79        | 0.97        | 36 | 2+3+4+6+7     | 0.93        | 0.97        |
| 15 | 2+3+4+7 | 0.87        | 0.97        | 37 | 2+3+5+6+7     | 0.95        | 0.97        |
| 16 | 2+3+5+6 | 0.88        | 0.97        | 38 | 2+4+5+6+7     | 0.96        | 0.96        |
| 17 | 2+3+5+7 | 0.92        | 0.97        | 39 | 3+4+5+6+7     | 0.95        | 0.97        |
| 18 | 2+4+5+6 | 0.84        | 0.97        | 40 | 1+2+3+4+5+7   | 0.89        | 0.98        |
| 19 | 2+4+5+7 | 0.90        | 0.96        | 41 | 1+2+3+4+6+7   | 0.91        | 0.98        |
| 20 | 2+4+6+7 | 0.93        | 0.96        | 42 | 1+2+3+5+6+7   | 0.94        | 0.98        |
| 21 | 2+5+6+7 | 0.93        | 0.92        | 43 | 2+3+4+5+6+7   | 0.94        | 0.97        |
| 22 | 3+4+5+6 | 0.88        | 0.98        | 44 | 1+2+3+4+5+6+7 | 0.93        | 0.98        |

Table S7. *Streamline designs A* (the low information prior) with successful convergence.

| No | Design | Sensitivity | Specificity | No | Design | Sensitivity | Specificity |
|----|--------|-------------|-------------|----|--------|-------------|-------------|
| 1  | 3+7    | 0.80        | 0.89        | 18 | 2+5+7  | 0.96        | 0.96        |
| 2  | 3+9    | 0.82        | 0.90        | 19 | 2+5+8  | 0.96        | 0.96        |
| 3  | 5+8    | 0.87        | 1.00        | 20 | 2+5+9  | 0.95        | 0.94        |
| 4  | 5+9    | 0.90        | 0.99        | 21 | 3+5+7  | 0.97        | 0.97        |
| 5  | 3+13   | 0.68        | 1.00        | 22 | 3+5+8  | 0.97        | 0.97        |
| 6  | 3+14   | 0.78        | 0.95        | 23 | 3+5+9  | 0.96        | 0.98        |
| 7  | 5+13   | 0.91        | 0.94        | 24 | 2+7+13 | 0.99        | 0.95        |
| 8  | 6+14   | 0.92        | 0.96        | 25 | 2+7+14 | 0.98        | 0.96        |
| 9  | 7+13   | 0.99        | 0.95        | 26 | 2+8+13 | 0.99        | 0.92        |
| 10 | 7+14   | 0.99        | 0.96        | 27 | 2+8+14 | 0.94        | 0.93        |
| 11 | 8+13   | 0.92        | 0.98        | 28 | 2+9+13 | 0.94        | 0.95        |
| 12 | 8+14   | 0.96        | 0.99        | 29 | 2+9+14 | 0.99        | 0.96        |
| 13 | 9+13   | 0.98        | 0.92        | 30 | 3+7+13 | 0.96        | 0.96        |
| 14 | 9+14   | 0.97        | 0.93        | 31 | 3+7+14 | 0.93        | 0.95        |
| 15 | 1+5+7  | 0.89        | 0.96        | 32 | 3+8+13 | 0.96        | 0.91        |
| 16 | 1+5+8  | 0.92        | 0.93        | 33 | 3+8+14 | 0.93        | 0.99        |
| 17 | 1+5+9  | 0.97        | 0.94        | 34 | 3+9+13 | 0.99        | 0.90        |
|    |        |             |             | 35 | 3+9+14 | 0.95        | 0.93        |

Table S8. *Streamline designs B* (3-sample and the low information prior) with successful convergence.

| No | Design | Sensitivity | Specificity | No | Design | Sensitivity | Specificity |
|----|--------|-------------|-------------|----|--------|-------------|-------------|
| 1  | 1+2+6  | 0.80        | 0.96        | 12 | 2+3+5  | 0.58        | 0.99        |
| 2  | 1+2+7  | 0.95        | 0.99        | 13 | 2+3+7  | 0.85        | 0.99        |
| 3  | 1+3+4  | 0.10        | 0.99        | 14 | 2+4+6  | 0.74        | 0.96        |
| 4  | 1+3+5  | 0.56        | 0.98        | 15 | 2+4+7  | 0.81        | 0.96        |
| 5  | 1+3+6  | 0.35        | 0.97        | 16 | 2+5+6  | 0.88        | 0.92        |
| 6  | 1+3+7  | 0.84        | 0.96        | 17 | 2+6+7  | 0.92        | 1.00        |
| 7  | 1+4+5  | 0.42        | 0.99        | 18 | 3+4+5  | 0.41        | 0.96        |
| 8  | 1+4+6  | 0.72        | 0.99        | 19 | 3+4+6  | 0.74        | 0.99        |
| 9  | 1+4+7  | 0.75        | 0.93        | 20 | 3+5+6  | 0.92        | 0.94        |
| 10 | 1+5+6  | 0.74        | 0.86        | 21 | 3+6+7  | 0.91        | 0.99        |
| 11 | 1+6+7  | 0.80        | 0.85        |    |        |             |             |

Table S9. *Streamline designs B* (4-sample, 5-sample, 6-sample and 7-sample and the low information prior) with successful convergence.

| No | Design  | Sensitivity | Specificity | No | Design        | Sensitivity | Specificity |
|----|---------|-------------|-------------|----|---------------|-------------|-------------|
| 1  | 1+2+3+4 | 0.14        | 1.00        | 22 | 3+4+6+7       | 0.89        | 0.96        |
| 2  | 1+2+3+5 | 0.68        | 0.99        | 23 | 3+5+6+7       | 0.87        | 0.99        |
| 3  | 1+2+3+6 | 0.82        | 0.98        | 24 | 1+2+3+4+5     | 0.65        | 0.99        |
| 4  | 1+2+3+7 | 0.90        | 0.97        | 25 | 1+2+3+4+6     | 0.63        | 0.99        |
| 5  | 1+3+4+5 | 0.55        | 0.98        | 26 | 1+2+3+4+7     | 0.75        | 1.00        |
| 6  | 1+3+4+6 | 0.75        | 0.97        | 27 | 1+3+4+5+6     | 0.74        | 1.00        |
| 7  | 1+3+4+7 | 0.86        | 0.97        | 28 | 1+3+4+5+7     | 0.68        | 0.99        |
| 8  | 1+3+5+7 | 0.95        | 0.99        | 29 | 1+3+4+6+7     | 0.90        | 0.94        |
| 9  | 1+4+5+6 | 0.81        | 0.99        | 30 | 1+3+5+6+7     | 0.91        | 0.99        |
| 10 | 1+4+5+7 | 0.85        | 0.98        | 31 | 1+4+5+6+7     | 0.90        | 0.98        |
| 11 | 1+5+6+7 | 0.88        | 0.92        | 32 | 2+3+4+5+6     | 0.82        | 0.96        |
| 12 | 2+3+4+6 | 0.85        | 0.93        | 33 | 2+3+4+5+7     | 0.82        | 0.97        |
| 13 | 2+3+4+7 | 0.85        | 0.92        | 34 | 2+3+4+6+7     | 0.91        | 0.98        |
| 14 | 2+3+5+6 | 0.84        | 0.93        | 35 | 2+3+5+6+7     | 0.95        | 0.95        |
| 15 | 2+3+5+7 | 0.90        | 0.99        | 36 | 2+4+5+6+7     | 0.97        | 0.97        |
| 16 | 2+4+5+6 | 0.78        | 0.99        | 37 | 3+4+5+6+7     | 0.96        | 0.96        |
| 17 | 2+4+5+7 | 0.86        | 0.95        | 38 | 1+2+3+4+5+7   | 0.87        | 0.96        |
| 18 | 2+4+6+7 | 0.92        | 0.98        | 39 | 1+2+3+4+6+7   | 0.88        | 0.99        |
| 19 | 2+5+6+7 | 0.93        | 0.96        | 40 | 1+2+3+5+6+7   | 0.92        | 0.99        |
| 20 | 3+4+5+6 | 0.80        | 0.96        | 41 | 2+3+4+5+6+7   | 0.92        | 0.99        |
| 21 | 3+4+5+7 | 0.93        | 0.97        | 42 | 1+2+3+4+5+6+7 | 0.92        | 0.98        |

Table S10. *Streamline designs A* (the informative prior) with successful convergence.

| No | Design | Sensitivity | Specificity | No | Design | Sensitivity | Specificity |
|----|--------|-------------|-------------|----|--------|-------------|-------------|
| 1  | 3+8    | 0.83        | 0.93        | 19 | 2+5+7  | 0.93        | 0.94        |
| 2  | 3+9    | 0.84        | 0.93        | 20 | 2+5+8  | 0.95        | 0.95        |
| 3  | 4+7    | 0.82        | 0.93        | 21 | 2+5+9  | 0.97        | 0.95        |
| 4  | 5+7    | 0.98        | 0.94        | 22 | 3+5+7  | 0.97        | 0.97        |
| 5  | 5+8    | 0.99        | 0.94        | 23 | 3+5+8  | 0.99        | 0.97        |
| 6  | 5+9    | 0.98        | 0.95        | 24 | 3+5+9  | 0.99        | 0.97        |
| 7  | 3+13   | 0.84        | 0.94        | 25 | 2+7+13 | 0.98        | 0.94        |
| 8  | 5+14   | 0.94        | 0.96        | 26 | 2+7+14 | 1.00        | 0.94        |
| 9  | 6+14   | 0.95        | 0.97        | 27 | 2+8+13 | 0.97        | 0.93        |
| 10 | 7+13   | 0.98        | 0.96        | 28 | 2+8+14 | 0.99        | 0.93        |
| 11 | 7+14   | 0.98        | 0.97        | 29 | 2+9+13 | 0.97        | 0.92        |
| 12 | 8+13   | 0.99        | 0.96        | 30 | 2+9+14 | 0.99        | 0.92        |
| 13 | 8+14   | 0.99        | 0.96        | 31 | 3+7+13 | 0.99        | 0.94        |
| 14 | 9+13   | 0.99        | 0.95        | 32 | 3+7+14 | 1.00        | 0.93        |
| 15 | 9+14   | 0.99        | 0.96        | 33 | 3+8+13 | 0.99        | 0.94        |
| 16 | 1+5+7  | 0.89        | 0.93        | 34 | 3+8+14 | 1.00        | 0.93        |
| 17 | 1+5+8  | 0.91        | 0.94        | 35 | 3+9+13 | 0.99        | 0.95        |
| 18 | 1+5+9  | 0.96        | 0.95        | 36 | 3+9+14 | 0.99        | 0.93        |

Table S11. *Streamline designs B* (3-sample and the informative prior) with successful convergence.

| No | Design | Sensitivity | Specificity | No | Design | Sensitivity | Specificity |
|----|--------|-------------|-------------|----|--------|-------------|-------------|
| 1  | 1+2+4  | 0.19        | 1.00        | 14 | 2+3+4  | 0.02        | 0.99        |
| 2  | 1+2+5  | 0.67        | 0.99        | 15 | 2+3+5  | 0.67        | 0.98        |
| 3  | 1+2+6  | 0.81        | 0.98        | 16 | 2+3+6  | 0.82        | 0.98        |
| 4  | 1+2+7  | 0.88        | 0.97        | 17 | 2+3+7  | 0.89        | 0.97        |
| 5  | 1+3+4  | 0.00        | 1.00        | 18 | 2+4+5  | 0.57        | 0.98        |
| 6  | 1+3+5  | 0.50        | 0.99        | 19 | 2+4+6  | 0.76        | 0.97        |
| 7  | 1+3+6  | 0.76        | 0.98        | 20 | 2+4+7  | 0.84        | 0.97        |
| 8  | 1+3+7  | 0.86        | 0.98        | 21 | 2+5+6  | 0.87        | 0.92        |
| 9  | 1+4+5  | 0.48        | 0.98        | 22 | 2+6+7  | 0.93        | 0.92        |
| 10 | 1+4+6  | 0.70        | 0.97        | 23 | 3+4+5  | 0.55        | 0.99        |
| 11 | 1+4+7  | 0.81        | 0.97        | 24 | 3+4+6  | 0.78        | 0.98        |
| 12 | 1+5+6  | 0.82        | 0.88        | 25 | 3+5+6  | 0.94        | 0.96        |
| 13 | 1+6+7  | 0.87        | 0.88        | 26 | 3+6+7  | 0.97        | 0.95        |

Table S12. *Streamline designs B* (4-sample, 5-sample, 6-sample and 7-sample and the informative prior) with successful convergence.

| No | Design  | Sensitivity | Specificity | No | Design        | Sensitivity | Specificity |
|----|---------|-------------|-------------|----|---------------|-------------|-------------|
| 1  | 1+2+3+4 | 0.14        | 1.00        | 23 | 3+4+5+7       | 0.93        | 0.97        |
| 2  | 1+2+3+5 | 0.68        | 0.99        | 24 | 3+4+6+7       | 0.93        | 0.98        |
| 3  | 1+2+3+6 | 0.82        | 0.98        | 25 | 3+5+6+7       | 0.97        | 0.95        |
| 4  | 1+2+3+7 | 0.90        | 0.97        | 26 | 1+2+3+4+5     | 0.65        | 0.98        |
| 5  | 1+3+4+5 | 0.55        | 0.98        | 27 | 1+2+3+4+6     | 0.78        | 0.98        |
| 6  | 1+3+4+6 | 0.75        | 0.97        | 28 | 1+2+3+4+7     | 0.87        | 0.98        |
| 7  | 1+3+4+7 | 0.86        | 0.97        | 29 | 1+3+4+5+6     | 0.84        | 0.97        |
| 8  | 1+3+5+6 | 0.87        | 0.98        | 30 | 1+3+4+5+7     | 0.90        | 0.98        |
| 9  | 1+3+5+7 | 0.93        | 0.97        | 31 | 1+3+4+6+7     | 0.92        | 0.98        |
| 10 | 1+4+5+6 | 0.80        | 0.96        | 32 | 1+3+5+6+7     | 0.94        | 0.97        |
| 11 | 1+4+5+7 | 0.89        | 0.96        | 33 | 1+4+5+6+7     | 0.92        | 0.95        |
| 12 | 1+5+6+7 | 0.87        | 0.89        | 34 | 2+3+4+5+6     | 0.84        | 0.97        |
| 13 | 2+3+4+5 | 0.60        | 0.97        | 35 | 2+3+4+5+7     | 0.91        | 0.97        |
| 14 | 2+3+4+6 | 0.79        | 0.97        | 36 | 2+3+4+6+7     | 0.93        | 0.97        |
| 15 | 2+3+4+7 | 0.87        | 0.97        | 37 | 2+3+5+6+7     | 0.95        | 0.97        |
| 16 | 2+3+5+6 | 0.88        | 0.97        | 38 | 2+4+5+6+7     | 0.96        | 0.96        |
| 17 | 2+3+5+7 | 0.92        | 0.97        | 39 | 3+4+5+6+7     | 0.95        | 0.97        |
| 18 | 2+4+5+6 | 0.84        | 0.97        | 40 | 1+2+3+4+5+7   | 0.89        | 0.98        |
| 19 | 2+4+5+7 | 0.90        | 0.96        | 41 | 1+2+3+4+6+7   | 0.91        | 0.98        |
| 20 | 2+4+6+7 | 0.93        | 0.96        | 42 | 1+2+3+5+6+7   | 0.94        | 0.98        |
| 21 | 2+5+6+7 | 0.93        | 0.92        | 43 | 2+3+4+5+6+7   | 0.94        | 0.97        |
| 22 | 3+4+5+6 | 0.88        | 0.98        | 44 | 1+2+3+4+5+6+7 | 0.93        | 0.98        |
